# Supplementary material for: Selective fluorescence detection of anilines and Fe3+ ions by two lanthanide metal–organic frameworks
Source: Royal Society of Chemistry journal article supplement (doi:10.1039/c6ra18336k), 2016-01-01
Supplement: c6ra18336k1.pdf [file c6ra18336k1.pdf]

# Selective Fluorescence Detection of Anilines and Fe<sup>3+</sup> ions by Two Lanthanide Metal – Organic Frameworks

Keheng Xu<sup>1</sup>, Fengqin Wang<sup>\*1</sup>, Shuo Huang<sup>1</sup>, Zongchao Yu<sup>1</sup>, Jianxin Zhang<sup>1</sup>, Jianguo Yu<sup>1</sup>, Haiyan Gao<sup>2</sup>, Yiyuan Fu<sup>1</sup>, Xiuyu Li<sup>1</sup>, Yongnan Zhao<sup>2</sup>

<sup>1</sup>College of Environment and Chemical Engineering & State Key Laboratory of Separation Membranes and Membrane Processes, Tianjin Polytechnic University, Tianjin 300387, China

<sup>2</sup>College of Materials and Engineering & Key Lab of Hollow Fiber Membrane Materials & Membrane Process, Tianjin Polytechnic University, Tianjin 300387, China

E-mail: wangfengqin@tjpu.edu.cn Tel: (+86)-22-83955457

## Supplementary materials

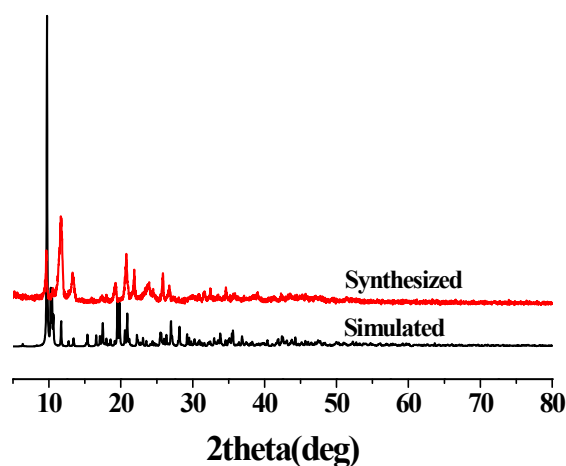

Fig. S1. The XRD patterns of 1 and the simulated.

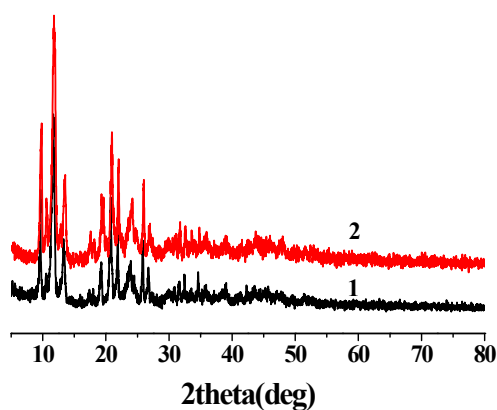

Fig. S2. The XRD patterns of 1 and 2.

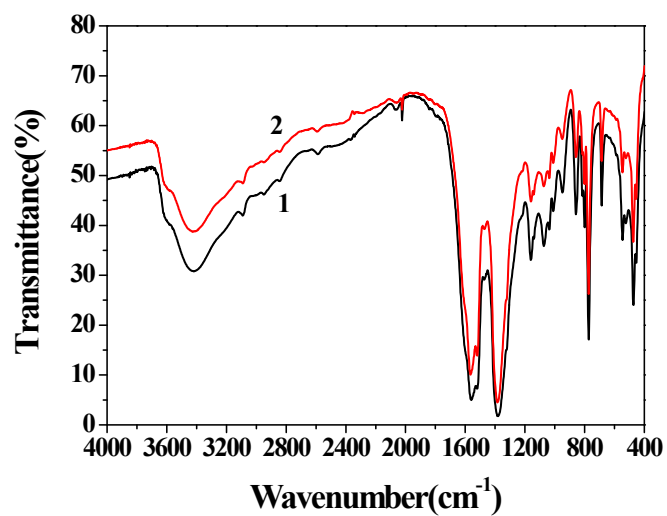

Fig. S3. IR spectra of 1 and 2.

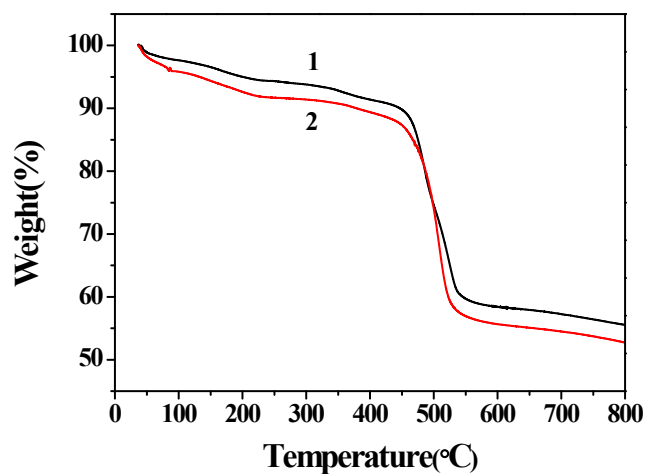

Fig. S4. TGA of 1 and 2.

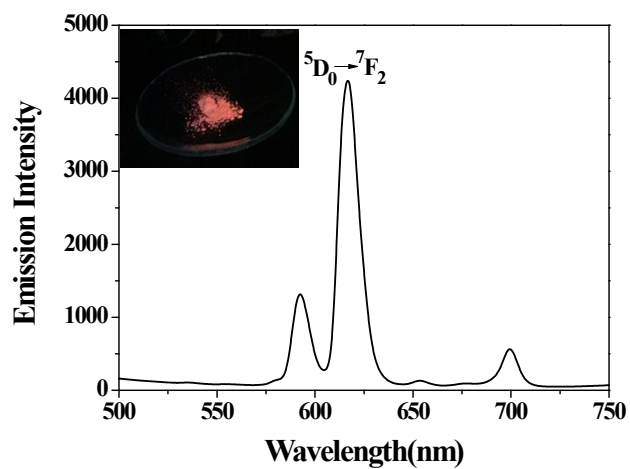

Fig. S5. The fluorescence spectra of 1 in the solid state.

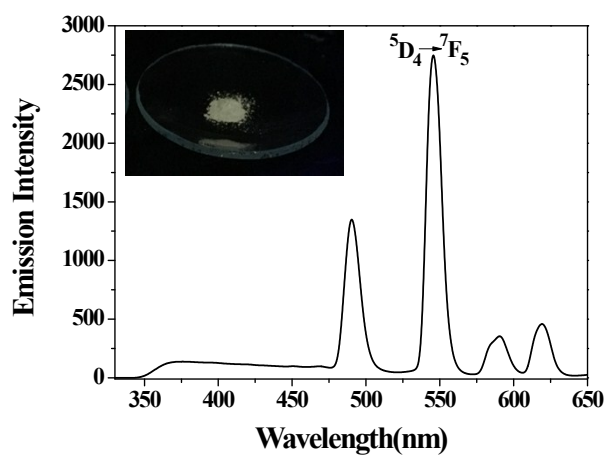

Fig. S6. The fluorescence spectra of **2** in the solid state.

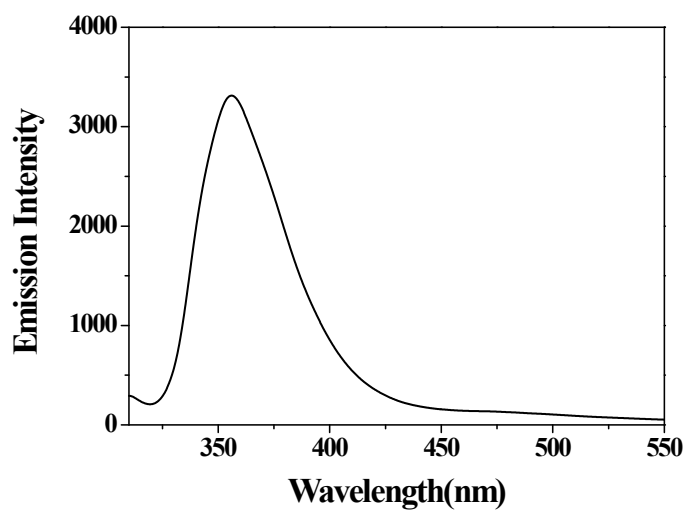

Fig. S7. The fluorescence spectra of L ligand in the solid state.

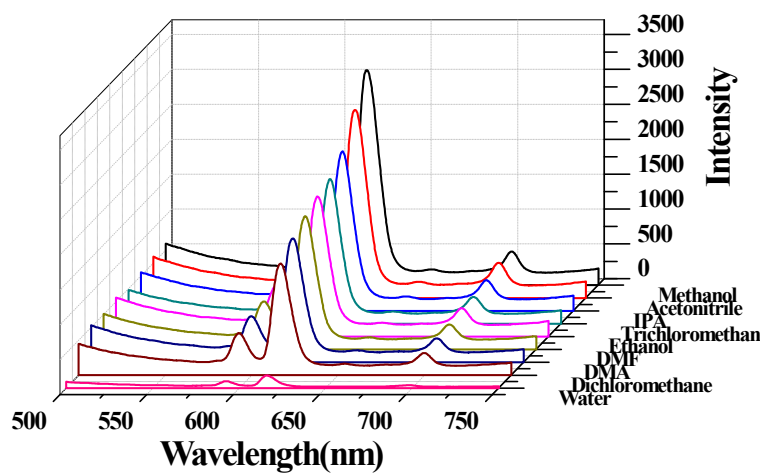

Fig. S8. Emission spectra of **1** in different organic solvent at room temperature.

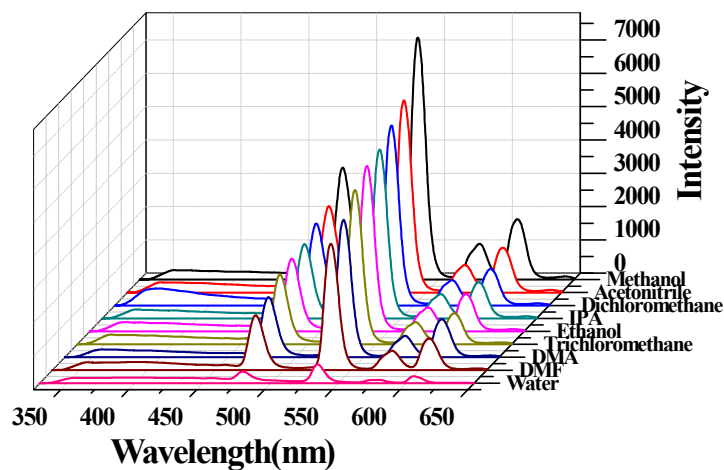

Fig. S9. Emission spectra of **2** in different organic solvent at room temperature.

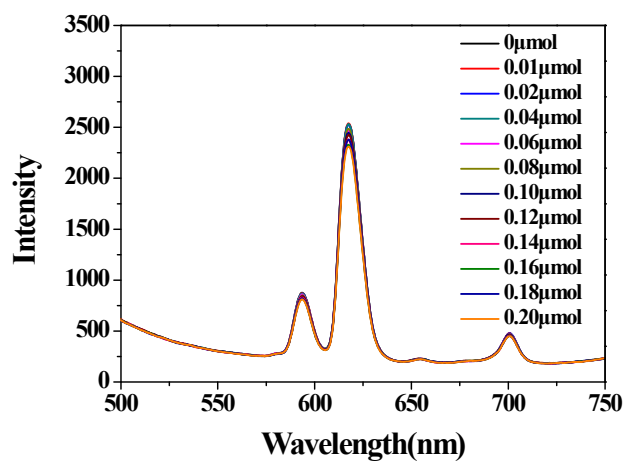

Fig. S10. Fluorescence titration of **1** dispersed in methanol with the addition of different volumes of  $10^{-3}$  M methanol solution of aniline.

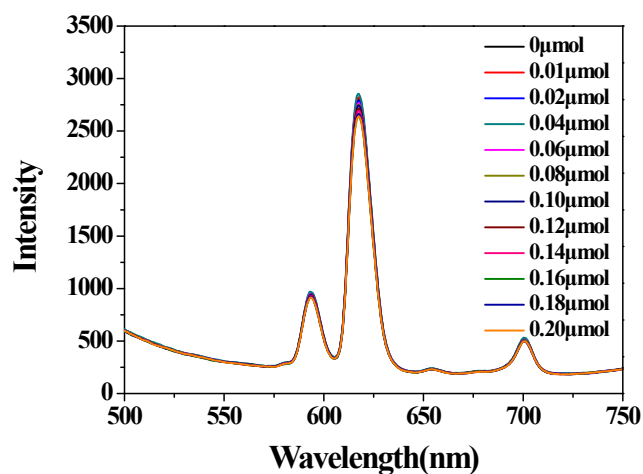

Fig. S11. Fluorescence titration of **1** dispersed in methanol with the addition of different volumes of  $10^{-3}$  M methanol solution of *p*-methylaniline.

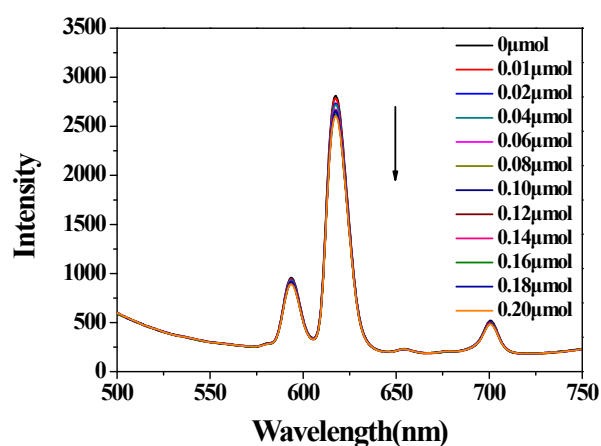

**Fig. S12.** Fluorescence titration of **1** dispersed in methanol with the addition of different volumes of  $10^{-3}$  M methanol solution of diphenylamine.

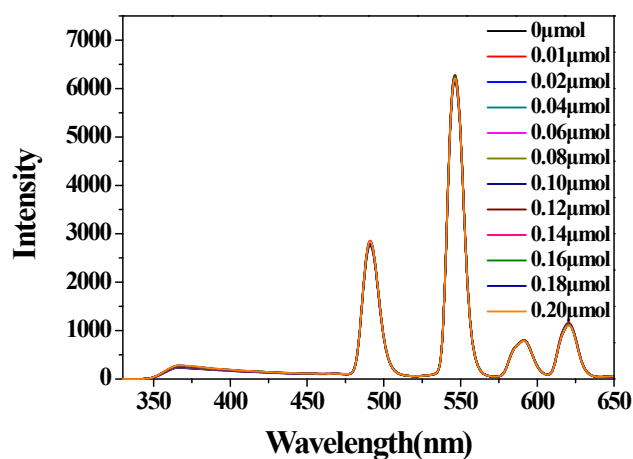

**Fig. S13.** Fluorescence titration of **2** dispersed in methanol with the addition of different volumes of  $10^{-3}$  M methanol solution of aniline.

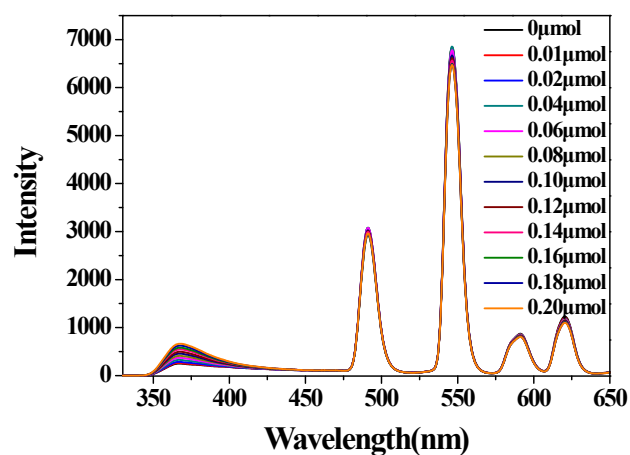

**Fig. S14.** Fluorescence titration of **2** dispersed in methanol with the addition of different volumes of  $10^{-3}$  M methanol solution of *p*-methylaniline.

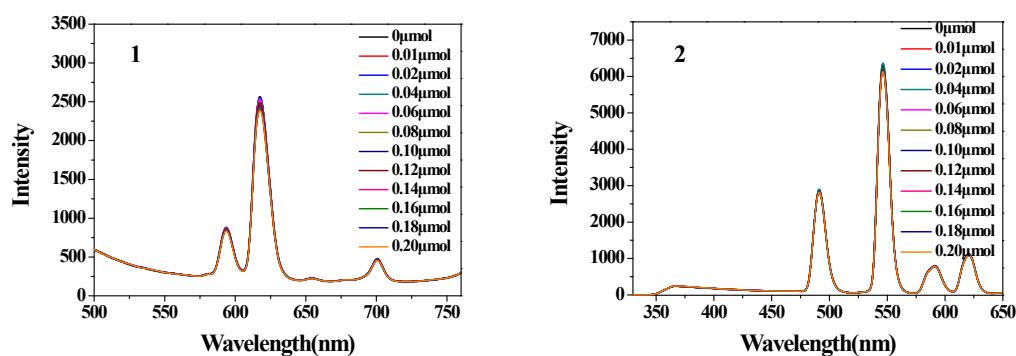

Fig. S15. Fluorescence titration of **1** and **2** dispersed in methanol with the addition of different volumes of  $10^{-3}$  M methanol solution of triethylamine.

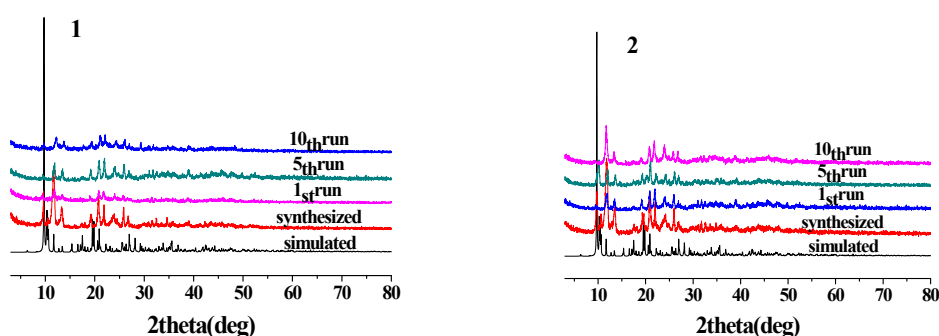

Fig. S16. The powder X-ray diffraction of **1** and **2** before and after the fluorescence titration.

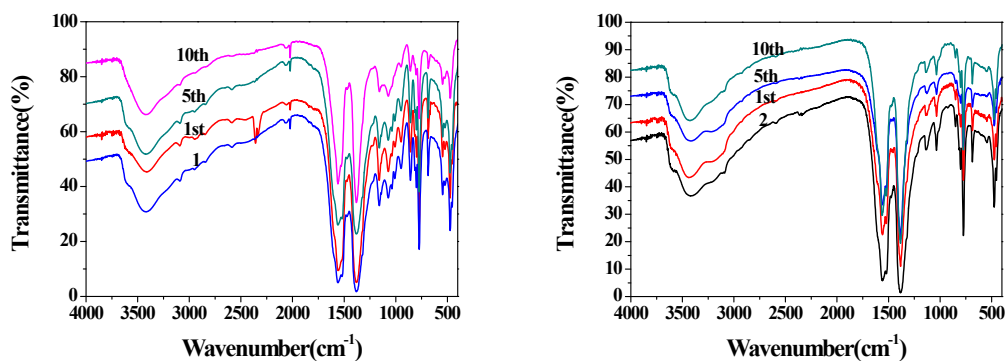

Fig. S17. IR spectra of **1** and **2** before and after the fluorescence titration.

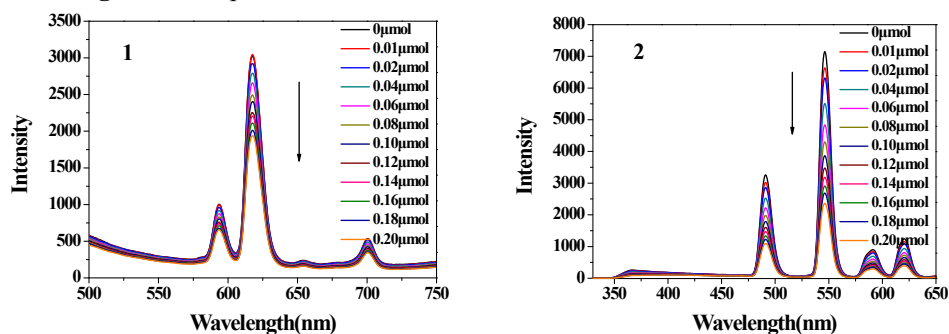

Fig. S18. Fluorescence titration of **1** and **2** dispersed in methanol with the addition of different volumes of  $10^{-3}$  M methanol solution containing  $\text{Fe}^{3+}$ . The slit widths for excitation and emission were both 5 nm.

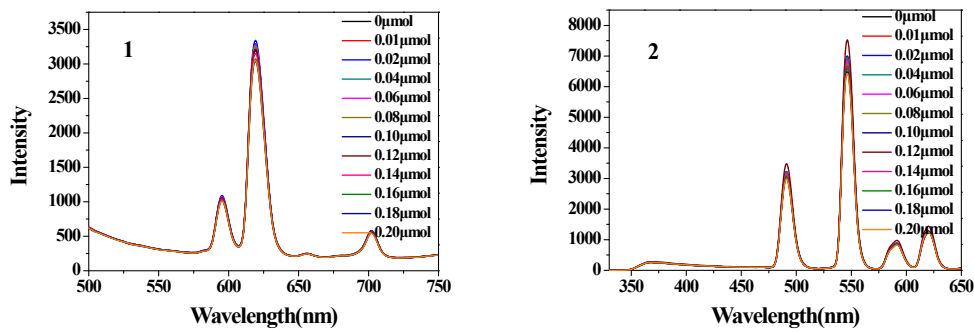

Fig. S19. Fluorescence titration of **1** and **2** dispersed in methanol with the addition of different volumes of  $10^{-3}$  M methanol solution containing  $Ag^+$ .

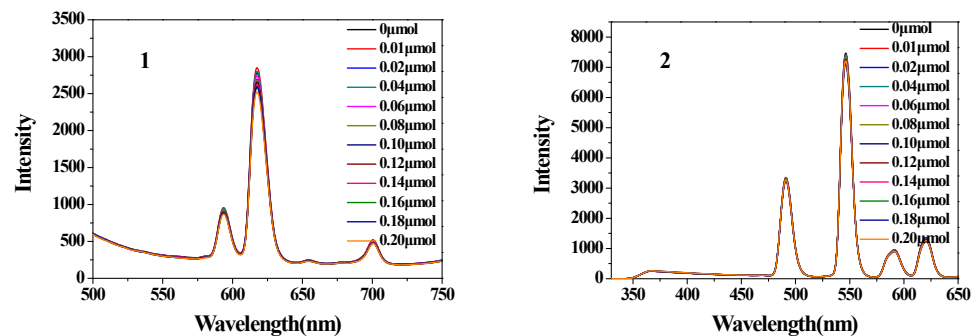

Fig. S20. Fluorescence titration of **1** and **2** dispersed in methanol with the addition of different volumes of  $10^{-3}$  M methanol solution containing  $Al^{3+}$ .

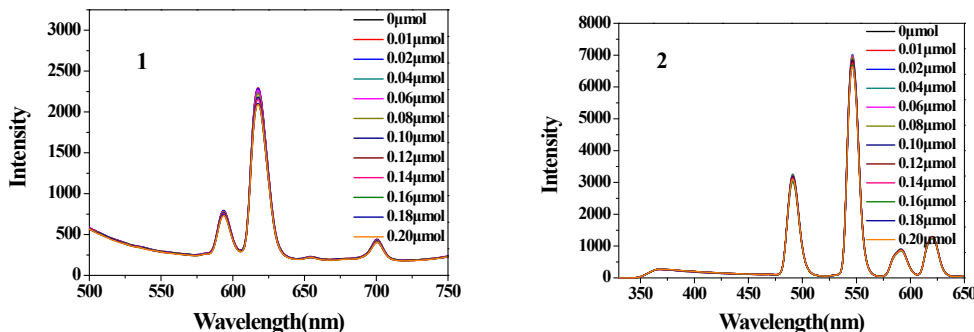

Fig. S21. Fluorescence titration of **1** and **2** dispersed in methanol with the addition of different volumes of  $10^{-3}$  M methanol solution containing  $Ba^{2+}$ .

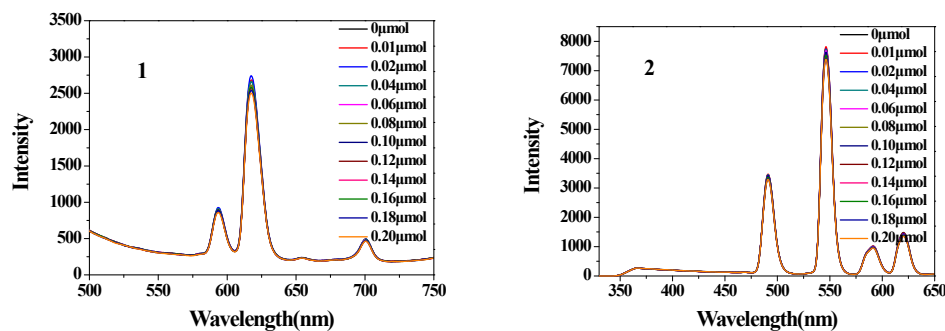

Fig. S22. Fluorescence titration of **1** and **2** dispersed in methanol with the addition of different volumes of  $10^{-3}$  M methanol solution containing  $Zn^{2+}$ .

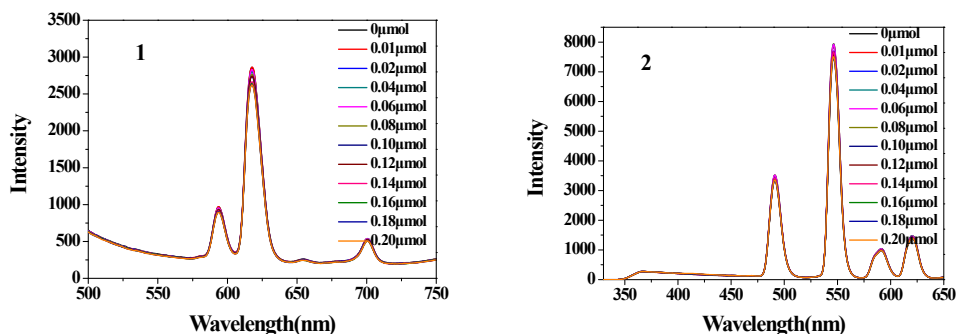

**Fig. S23.** Fluorescence titration of **1** and **2** dispersed in methanol with the addition of different volumes of 10<sup>-3</sup> M methanol solution containing Ca<sup>2+</sup>.

**1**

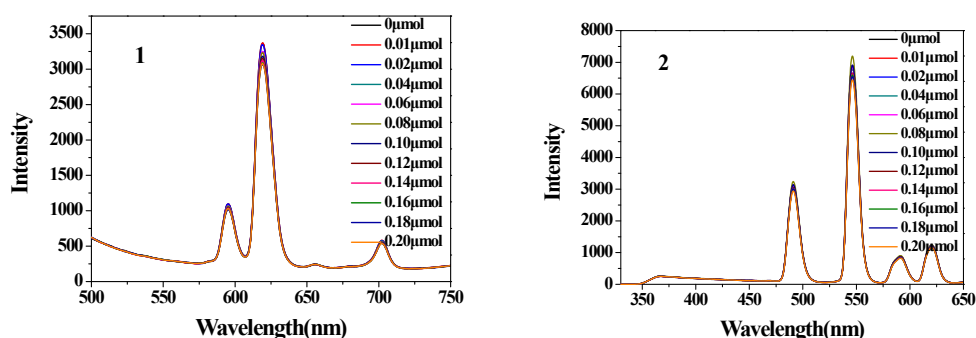

**Fig. S24.** Fluorescence titration of **1** and **2** dispersed in methanol with the addition of different volumes of 10<sup>-3</sup> M methanol solution containing Co<sup>2+</sup>.

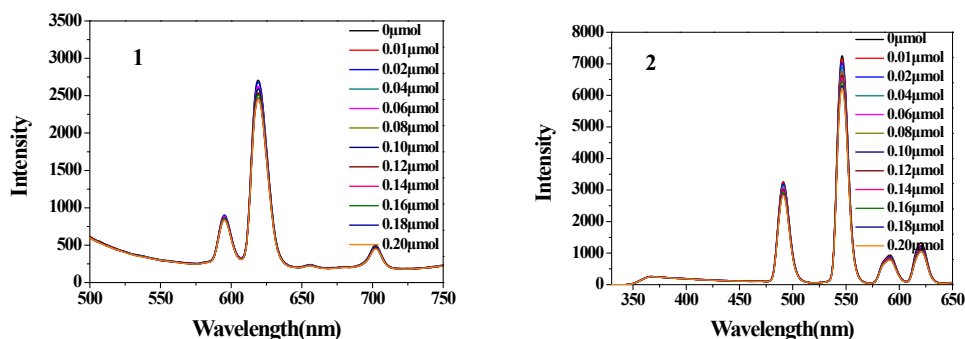

**Fig. S25.** Fluorescence titration of **1** and **2** dispersed in methanol with the addition of different volumes of 10<sup>-3</sup> M methanol solution containing Cu<sup>2+</sup>.

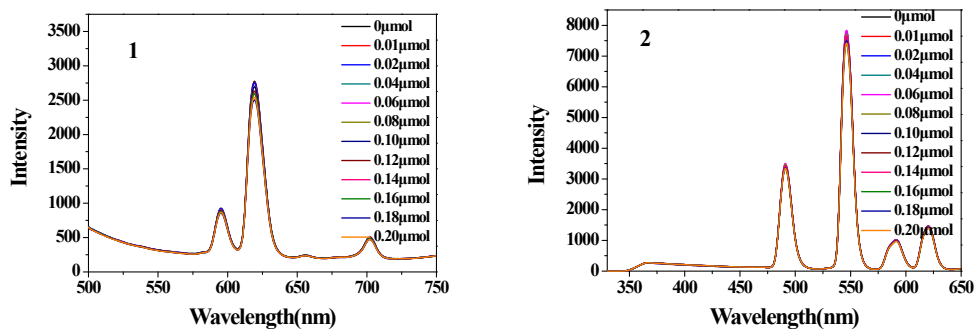

**Fig. S26.** Fluorescence titration of **1** and **2** dispersed in methanol with the addition of different volumes of 10<sup>-3</sup> M methanol solution containing Li<sup>+</sup>.



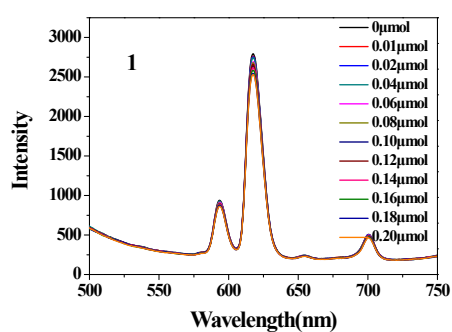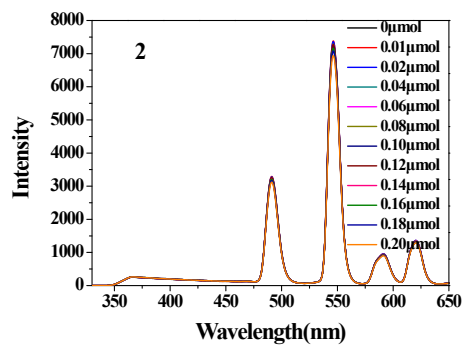

**Fig. S27.** Fluorescence titration of **1** and **2** dispersed in methanol with the addition of different volumes of  $10^{-3}$  M methanol solution containing  $Mg^{2+}$ .

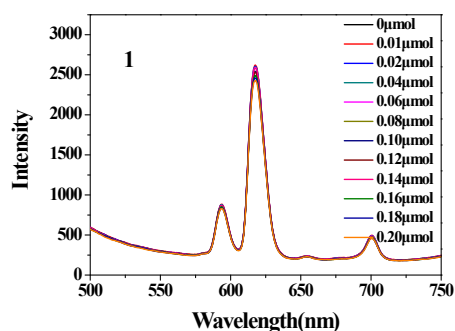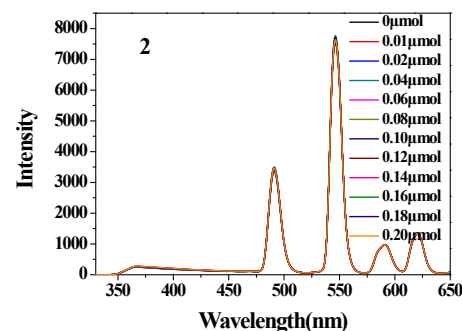

**Fig. S28.** Fluorescence titration of **1** and **2** dispersed in methanol with the addition of different volumes of  $10^{-3}$  M methanol solution containing  $Na^{+}$ .

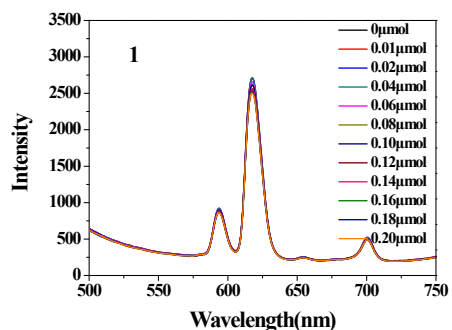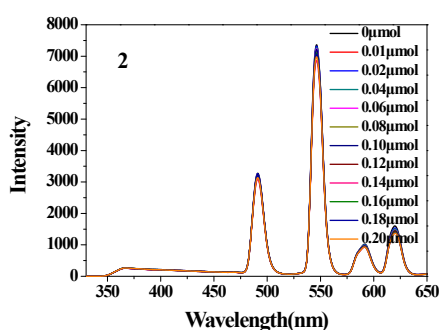

**Fig. S29.** Fluorescence titration of **1** and **2** dispersed in methanol with the addition of different volumes of  $10^{-3}$  M methanol solution containing  $Ni^{2+}$ .

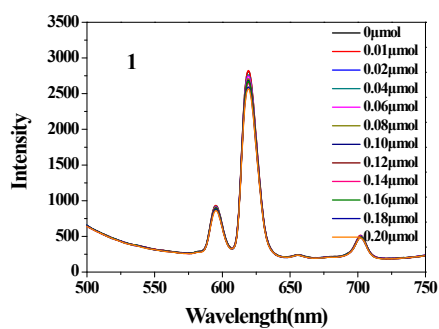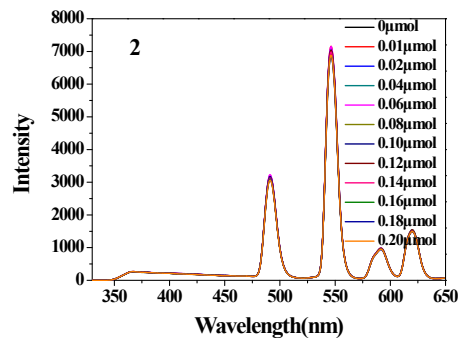

**Fig. S30.** Fluorescence titration of **1** and **2** dispersed in methanol with the addition of different volumes of  $10^{-3}$  M methanol solution containing  $Pb^{2+}$ .
